# Supplementary material
Source: PubMed Central journal article supplement (PMC6451375)
Supplement: rsbl20180918supp1.pdf [file rsbl20180918supp1.pdf]

## *Magnetic storms disrupt nocturnal migratory activity in songbirds*

*Giuseppe Bianco, Mihaela Ilieva and Susanne Åkesson*

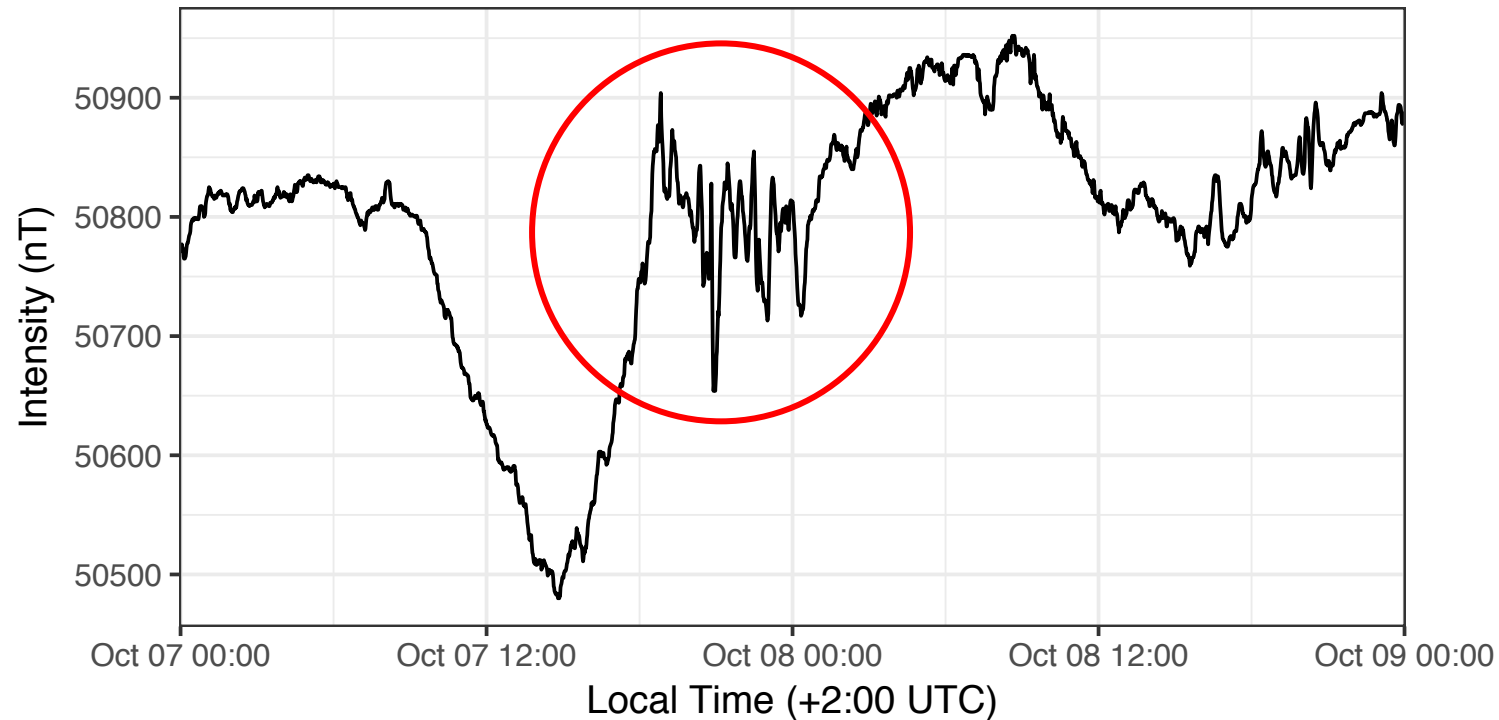

**Figure S1.** Example of geomagnetic intensity profile during a magnetic storm recorded between 7 and 8 October 2015 in the same facility and with the same equipment used during the experiments. The red circle indicates a phase of short-term periodic variation of the disturbance that we tried to replicate in amplitude and frequency composition during our experiment.
