# Supplementary material
Source: PubMed Central journal article supplement (PMC6451375)

# Chiffchaff – House 3

Ring

- CK95341
- CK95343
- CK95345
- CK95352

Oct 13

Oct 14

Oct 15

Oct 16

Oct 17

Oct 18

Oct 19

Flying Time Ratio

0.0 0.1 0.2

00:00 06:00 12:00 18:00 00:00

Local Time (+2:00 UTC)

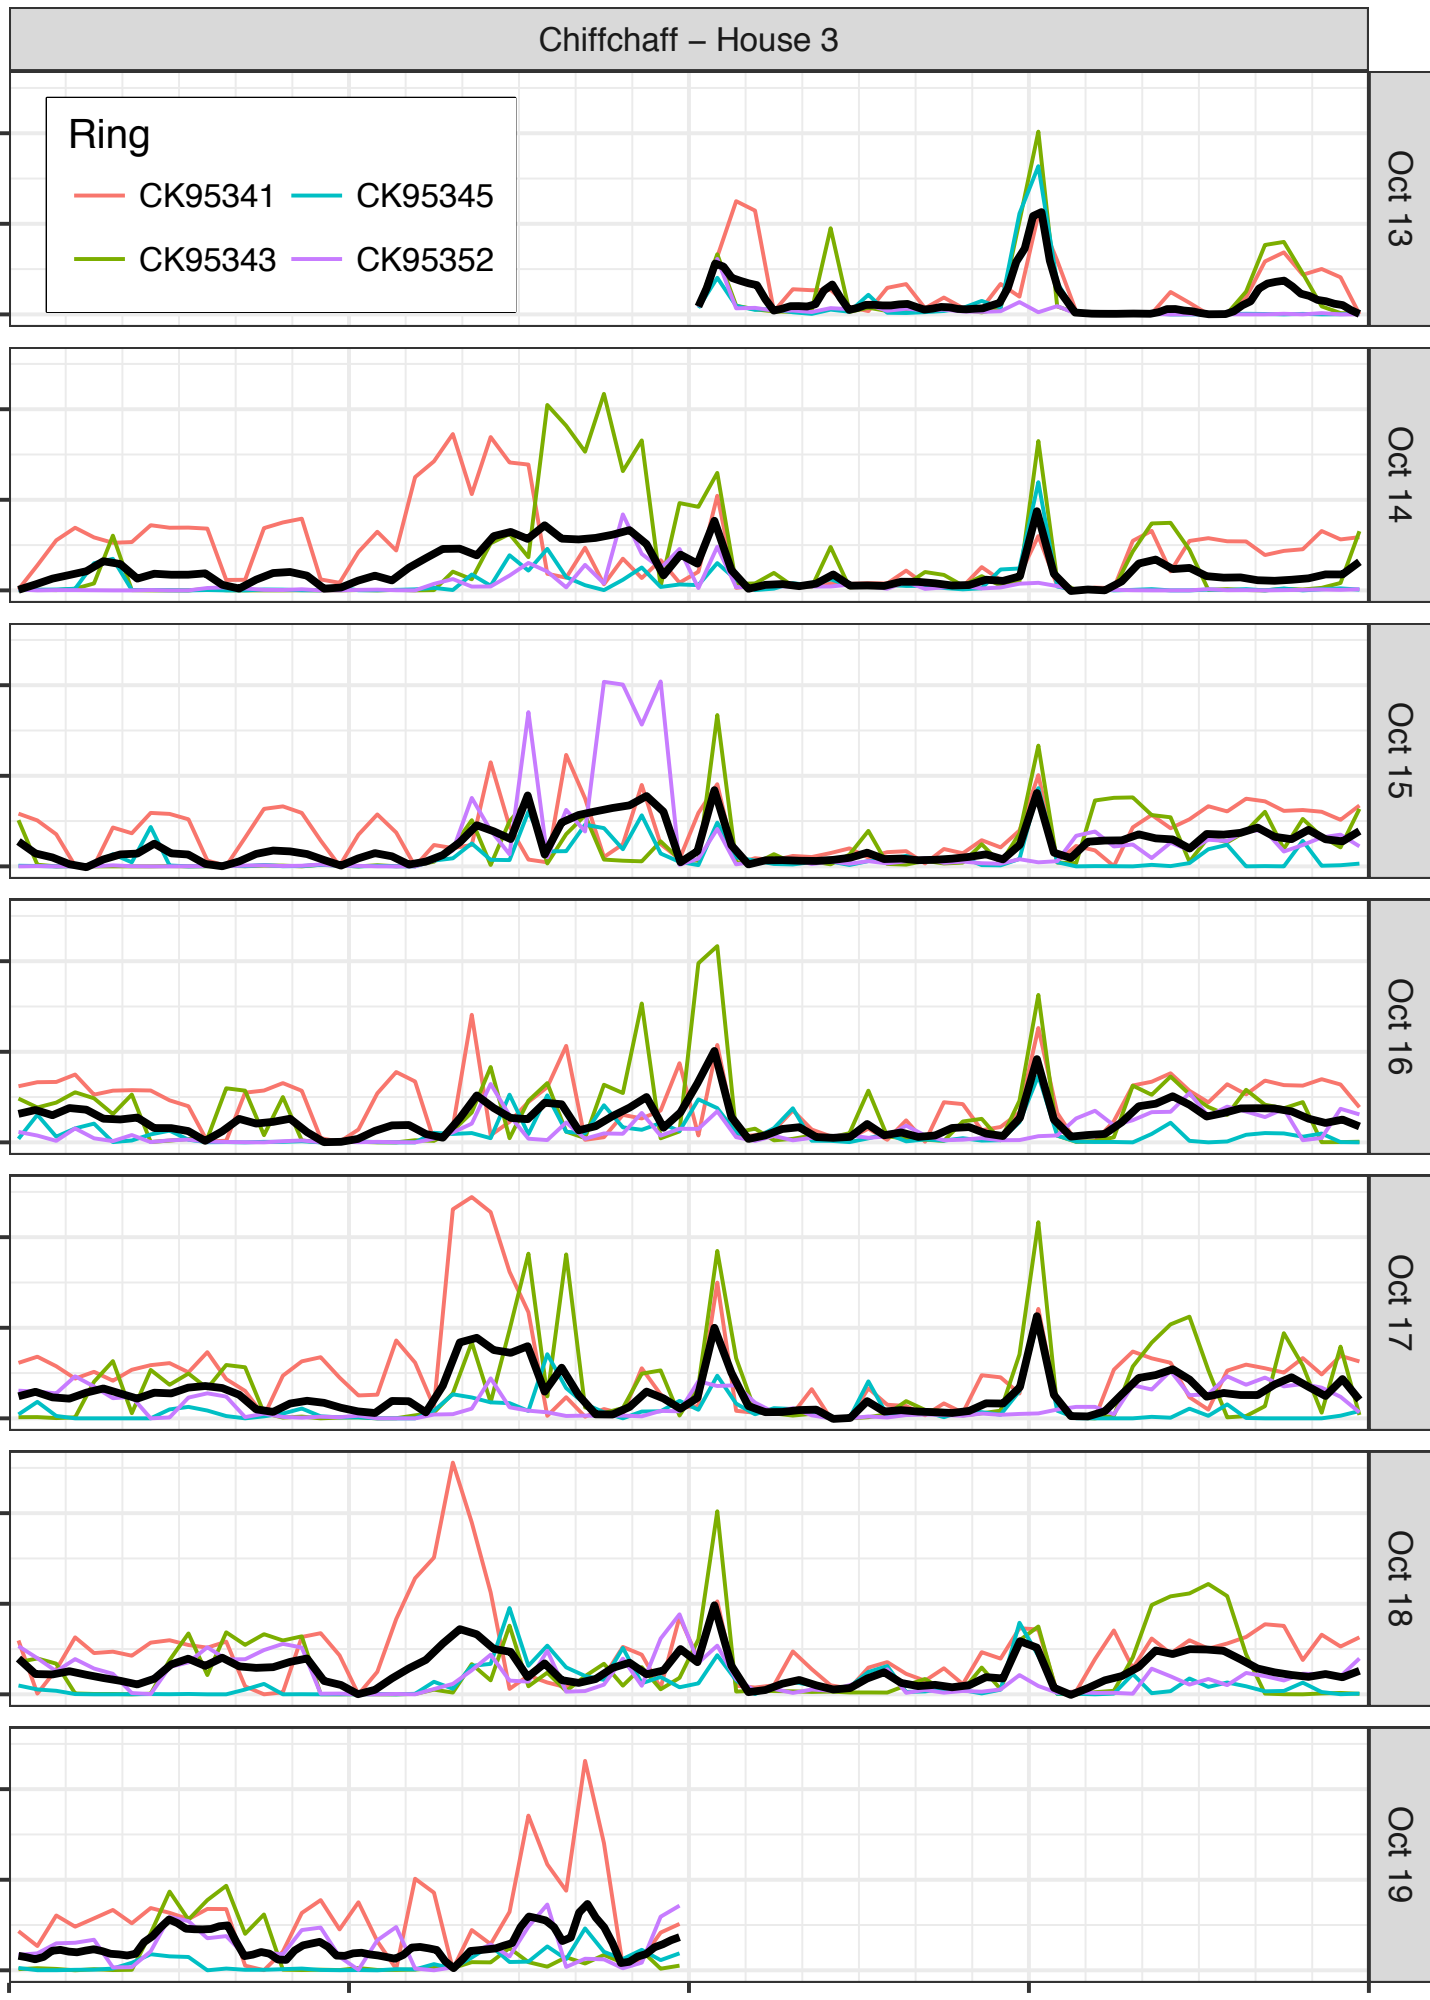

Chiffchaff – House 5

Ring

- CK95340
- CK95342
- CK95346
- CK95351

Oct 13

Oct 14

Oct 15

Oct 16

Oct 17

Oct 18

Oct 19

Flying Time Ratio

0.0 0.1 0.2

00:00 06:00 12:00 18:00 00:00

Local Time (+2:00 UTC)

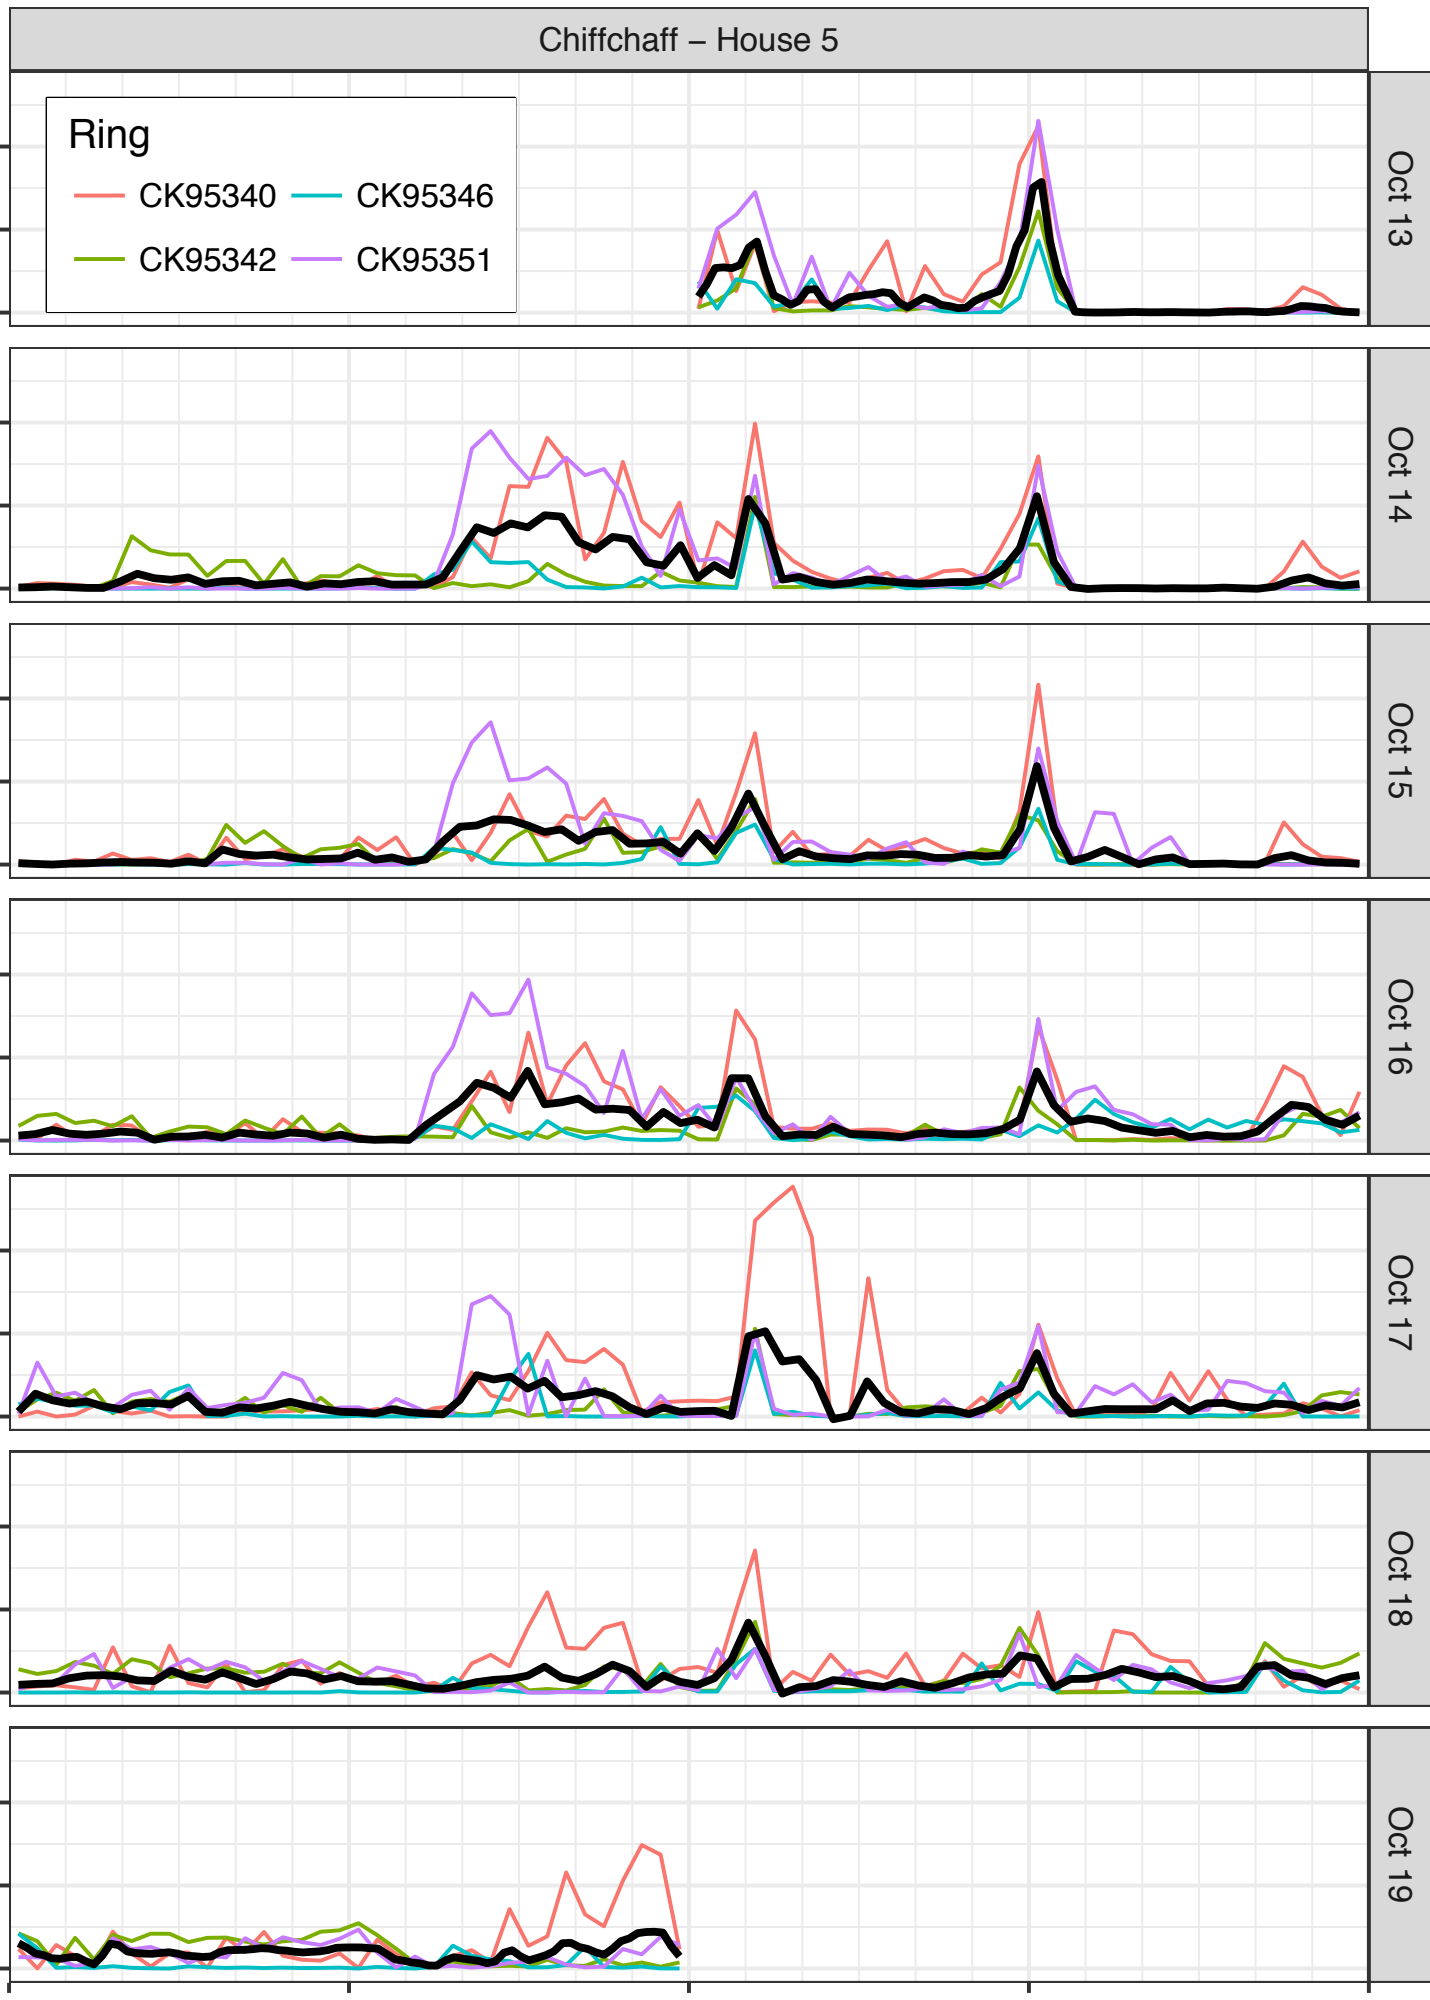

Dunnock – House 4

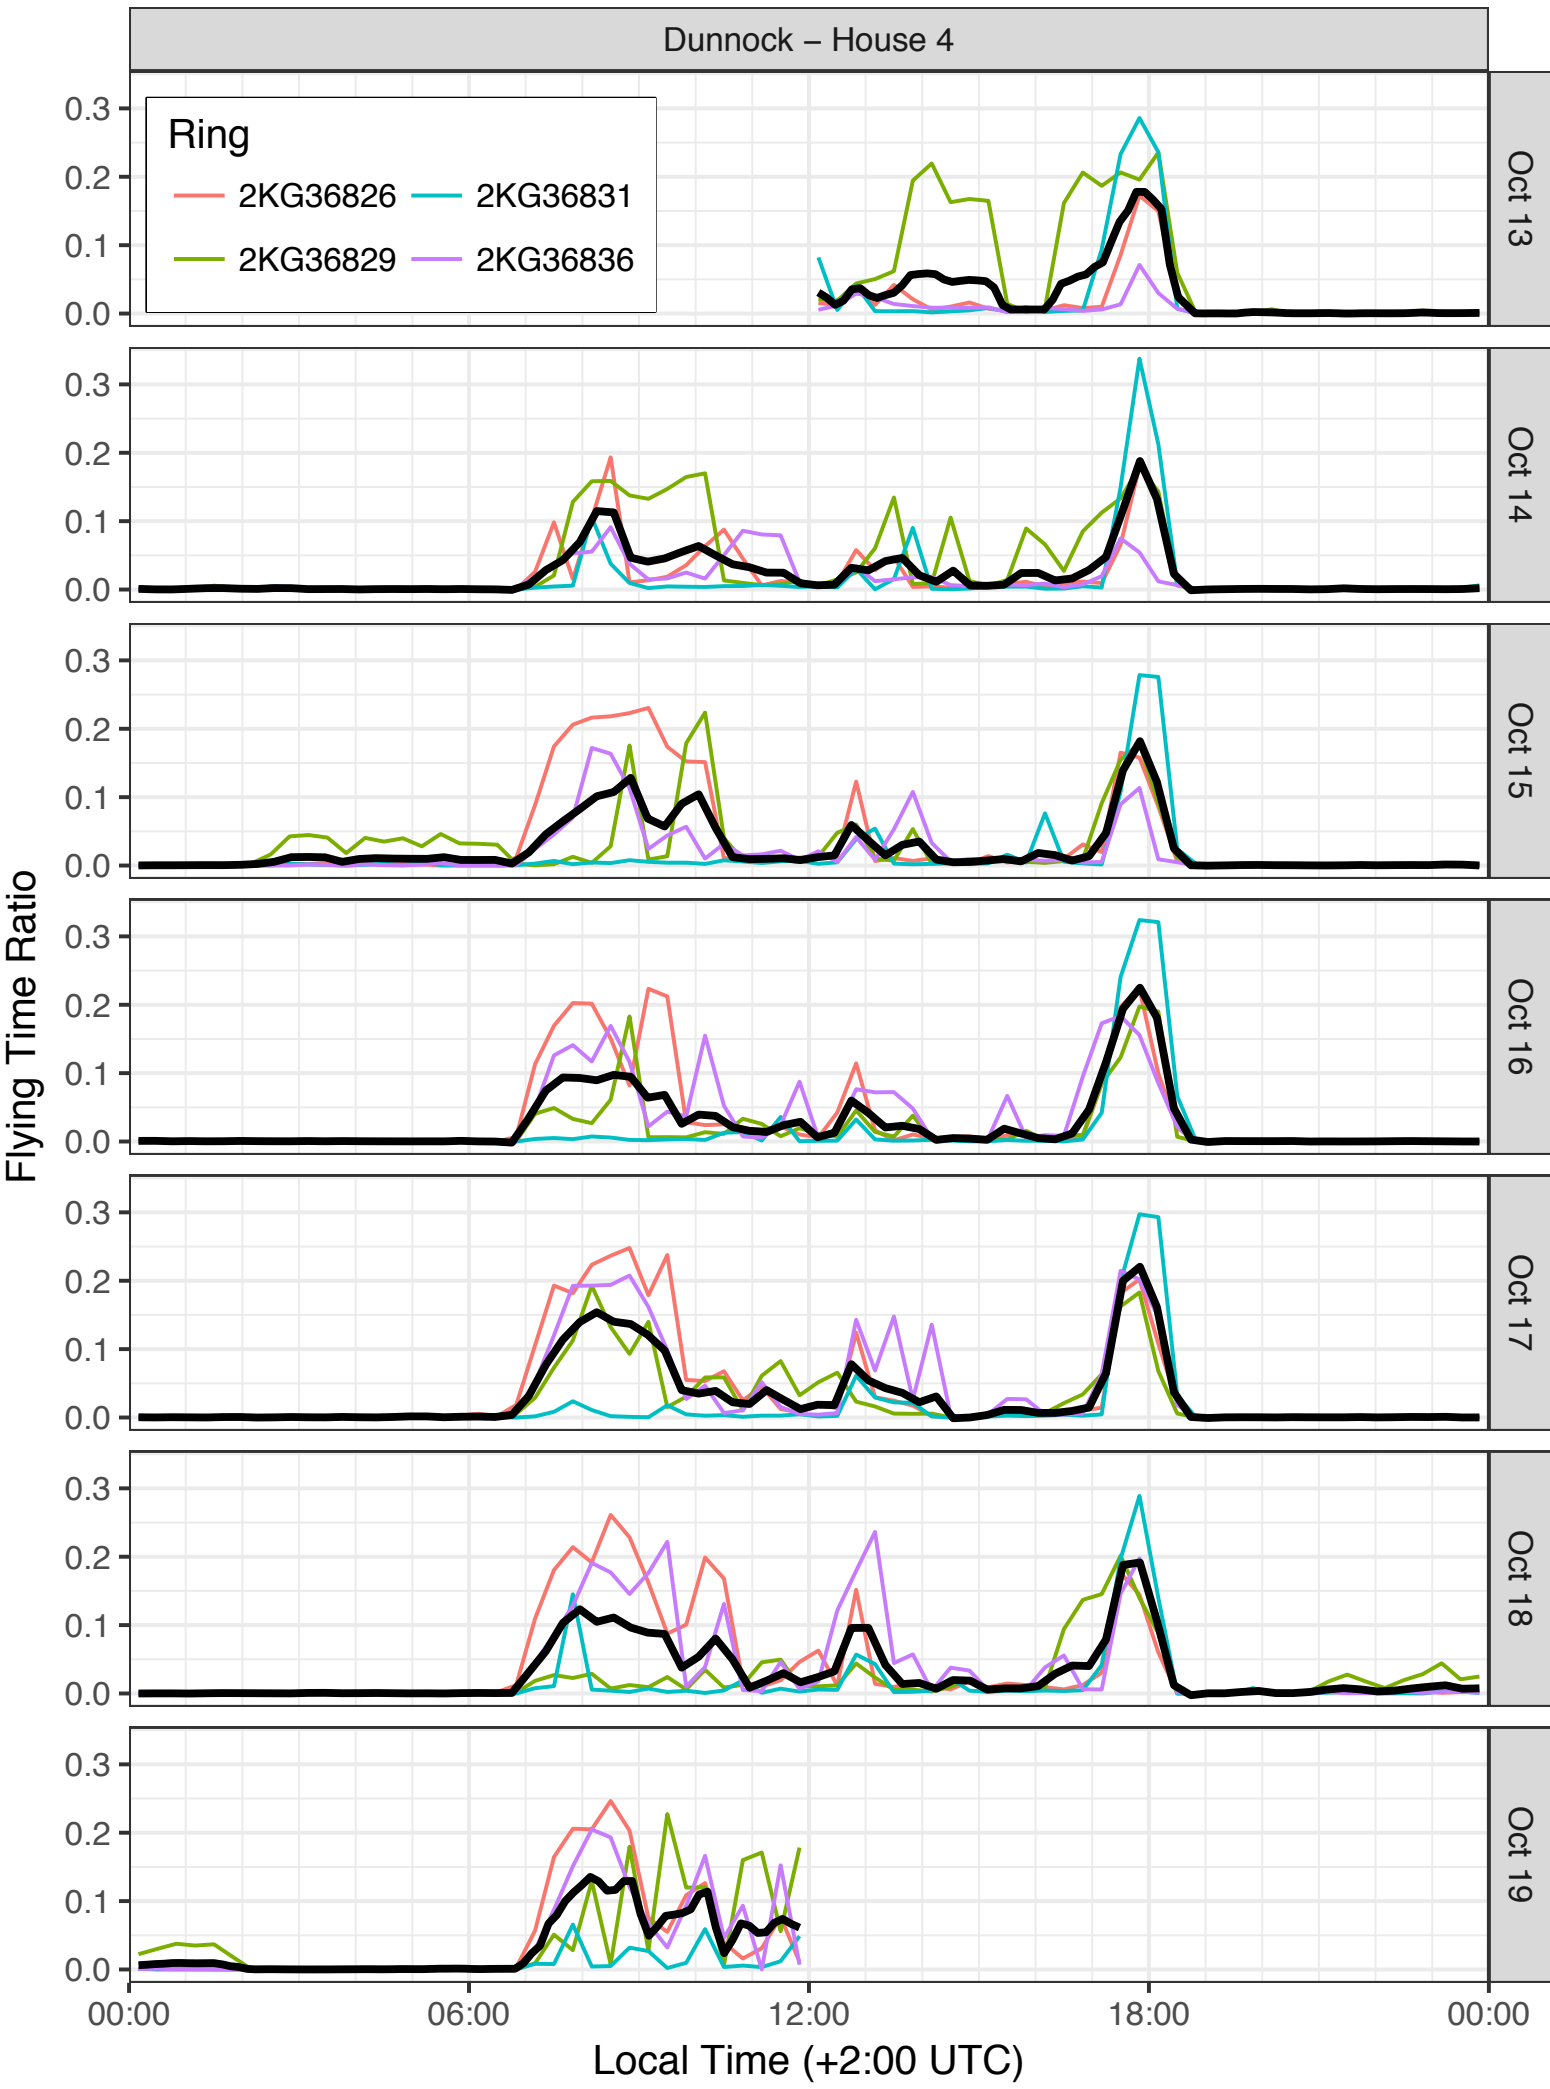

Dunnock – House 6

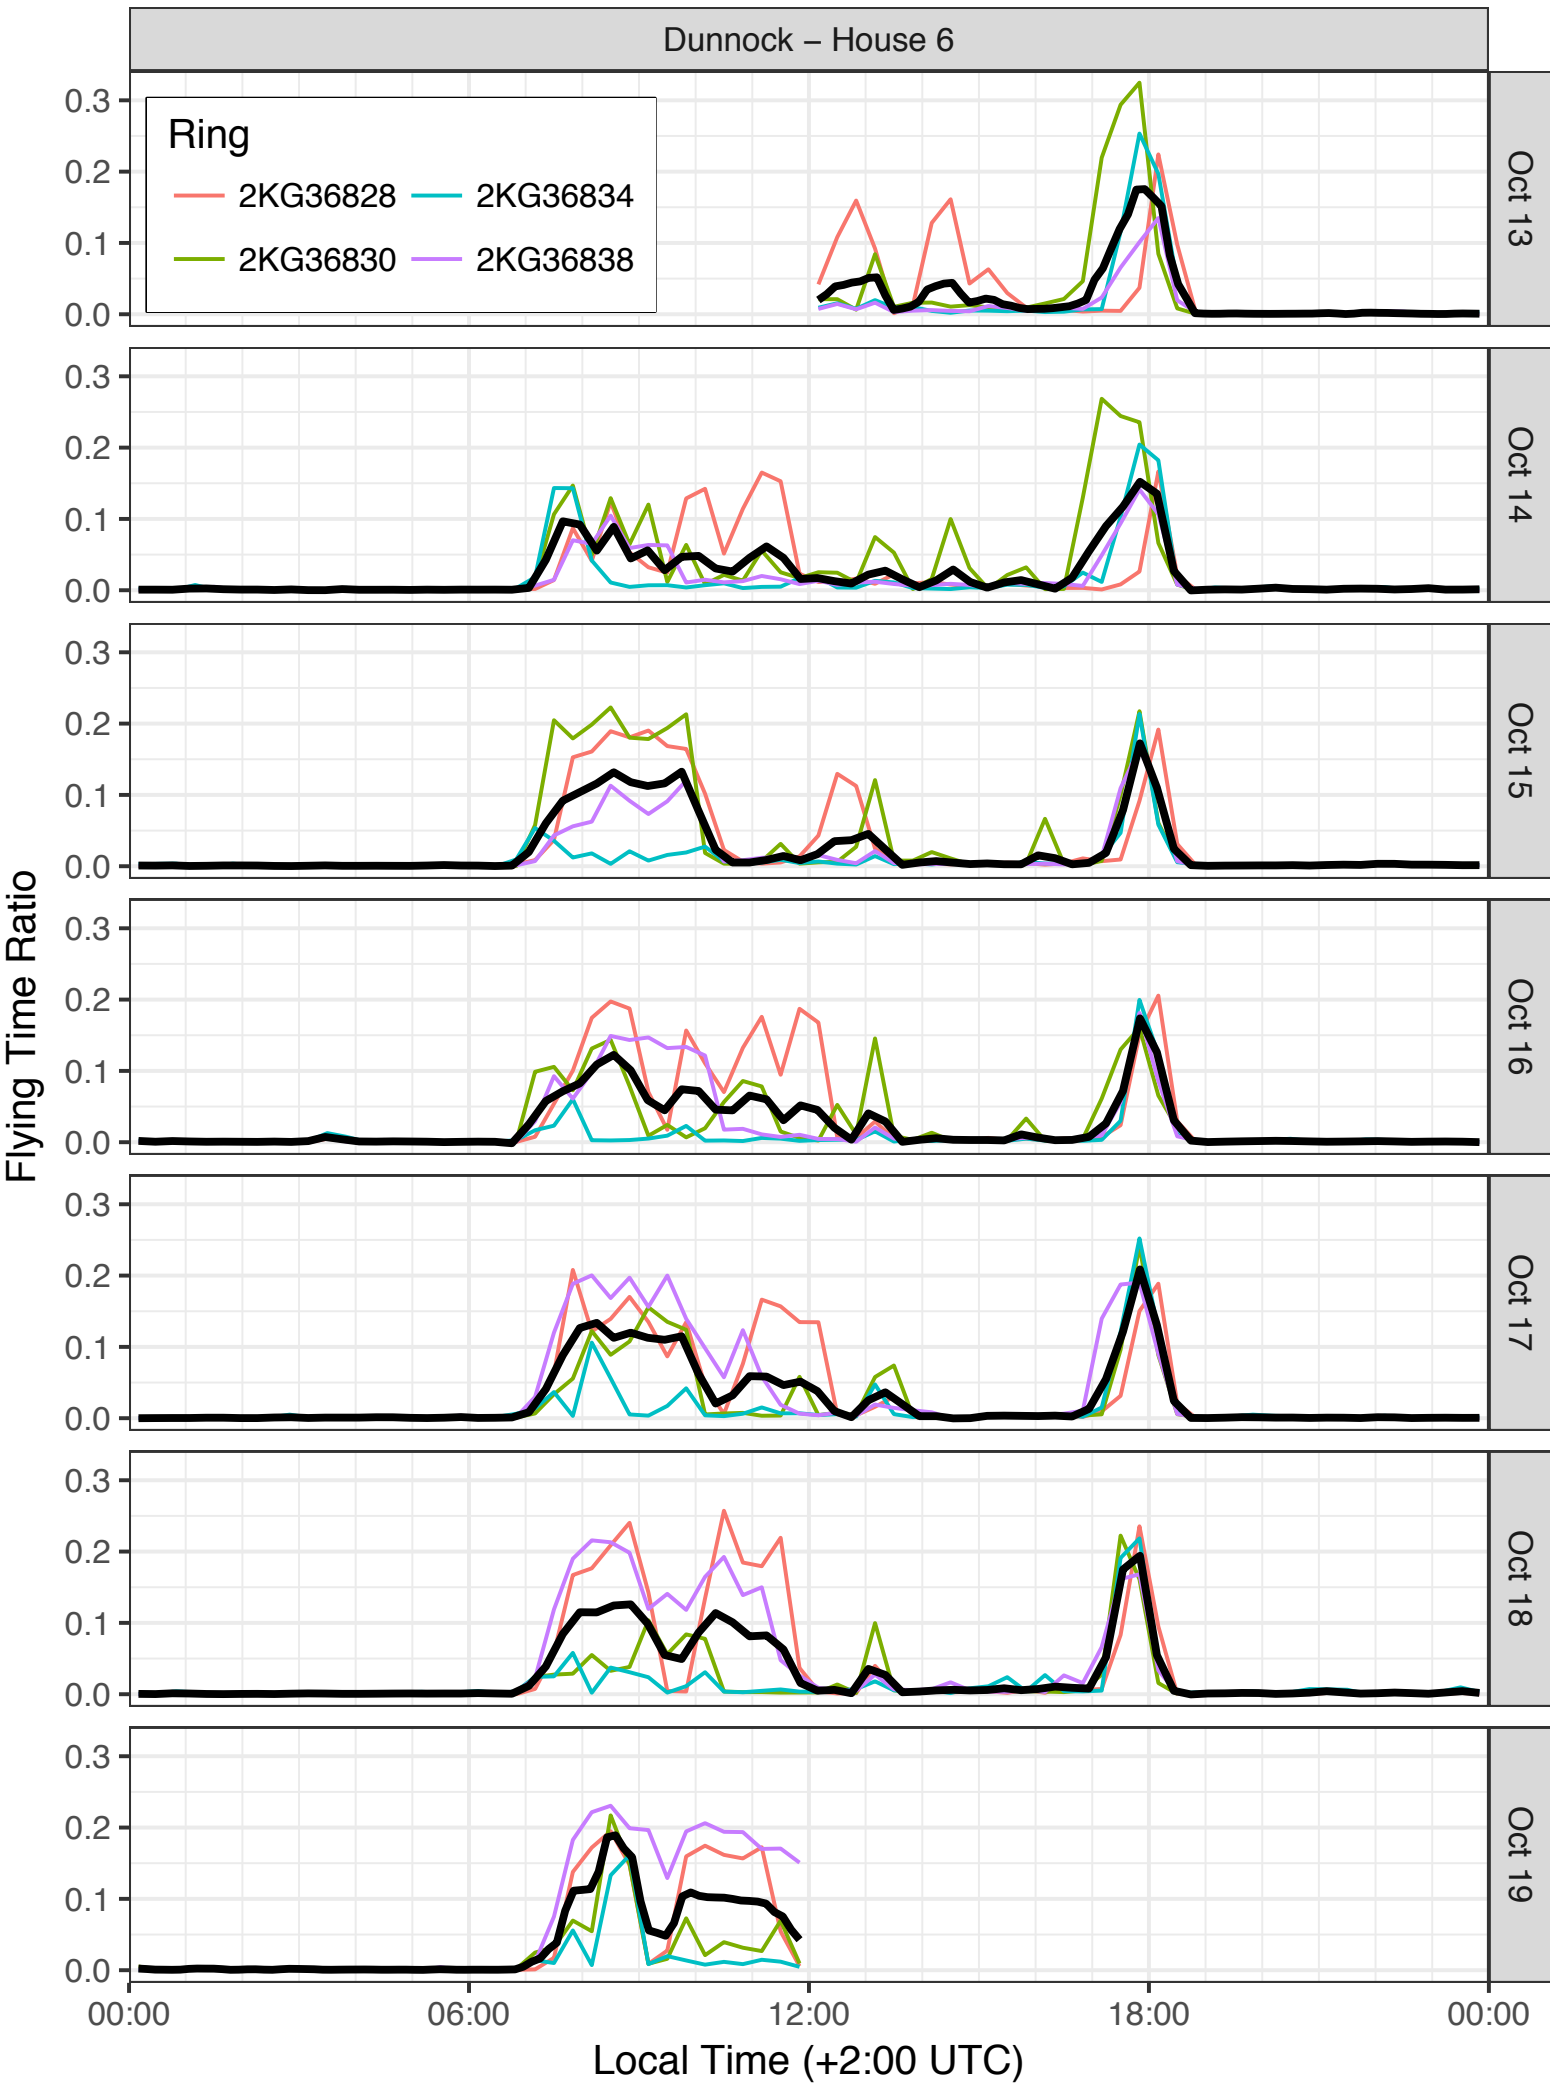

Robin – House 3

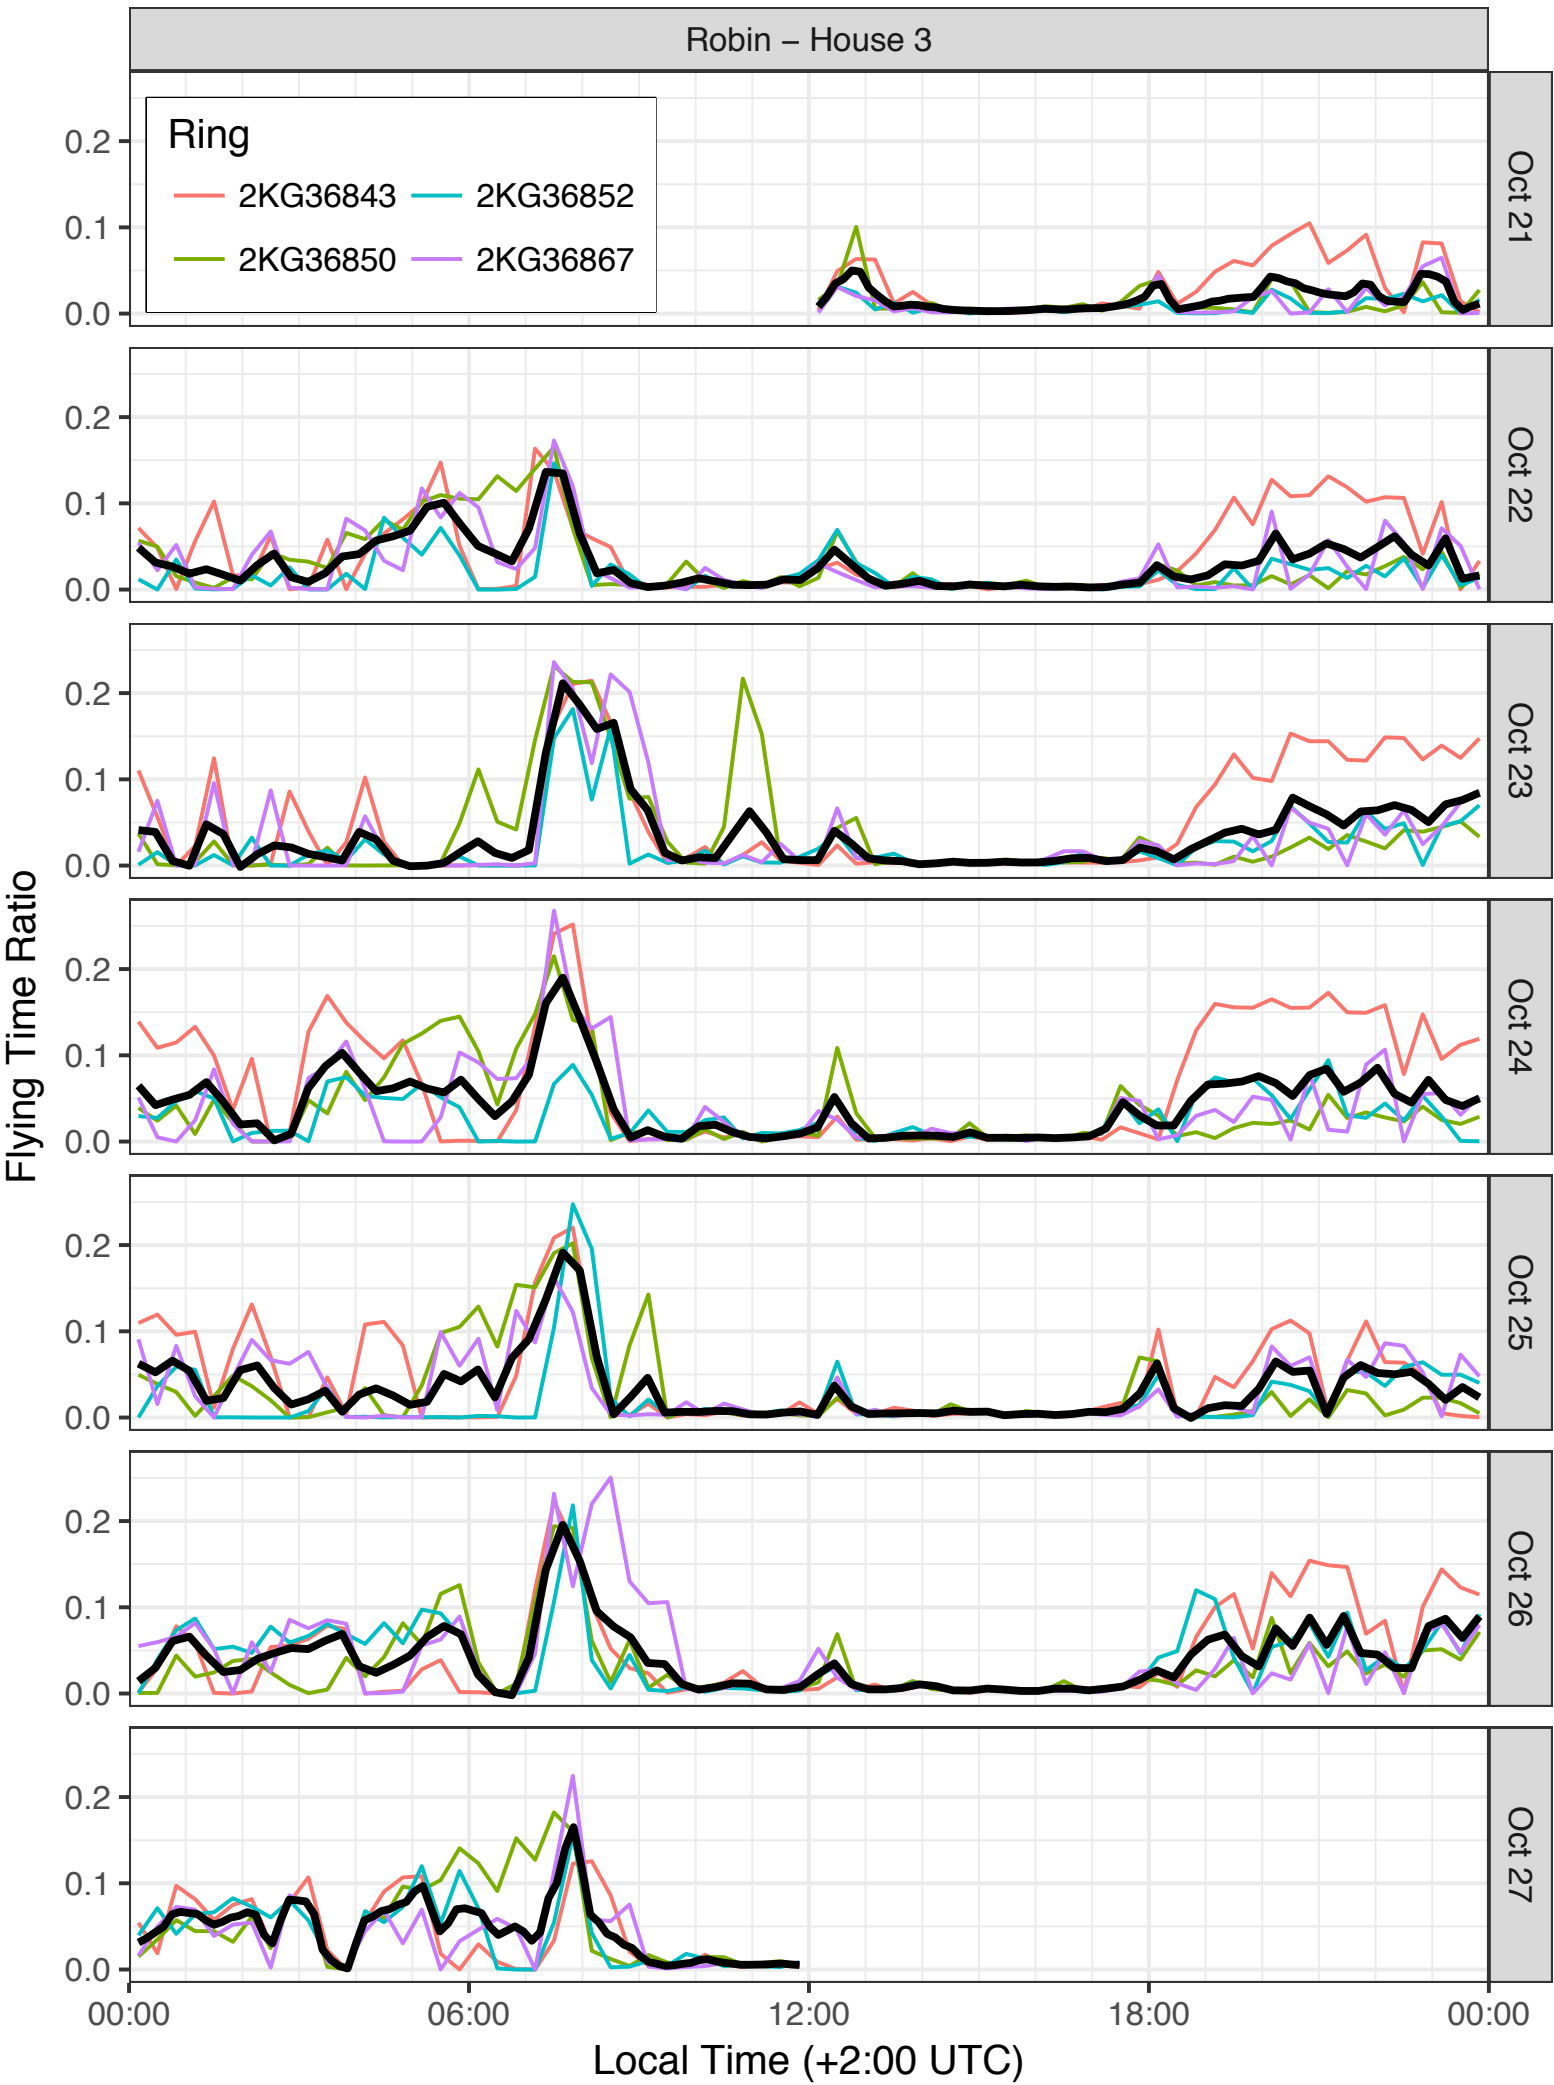

Robin – House 5

Ring

- 2KG36842
- 2KG36864
- 2KG36851
- 2KG36865

Oct 21

Oct 22

Oct 23

Oct 24

Oct 25

Oct 26

Oct 27

Flying Time Ratio

0.0  
0.1  
0.2

00:00 06:00 12:00 18:00 00:00

Local Time (+2:00 UTC)

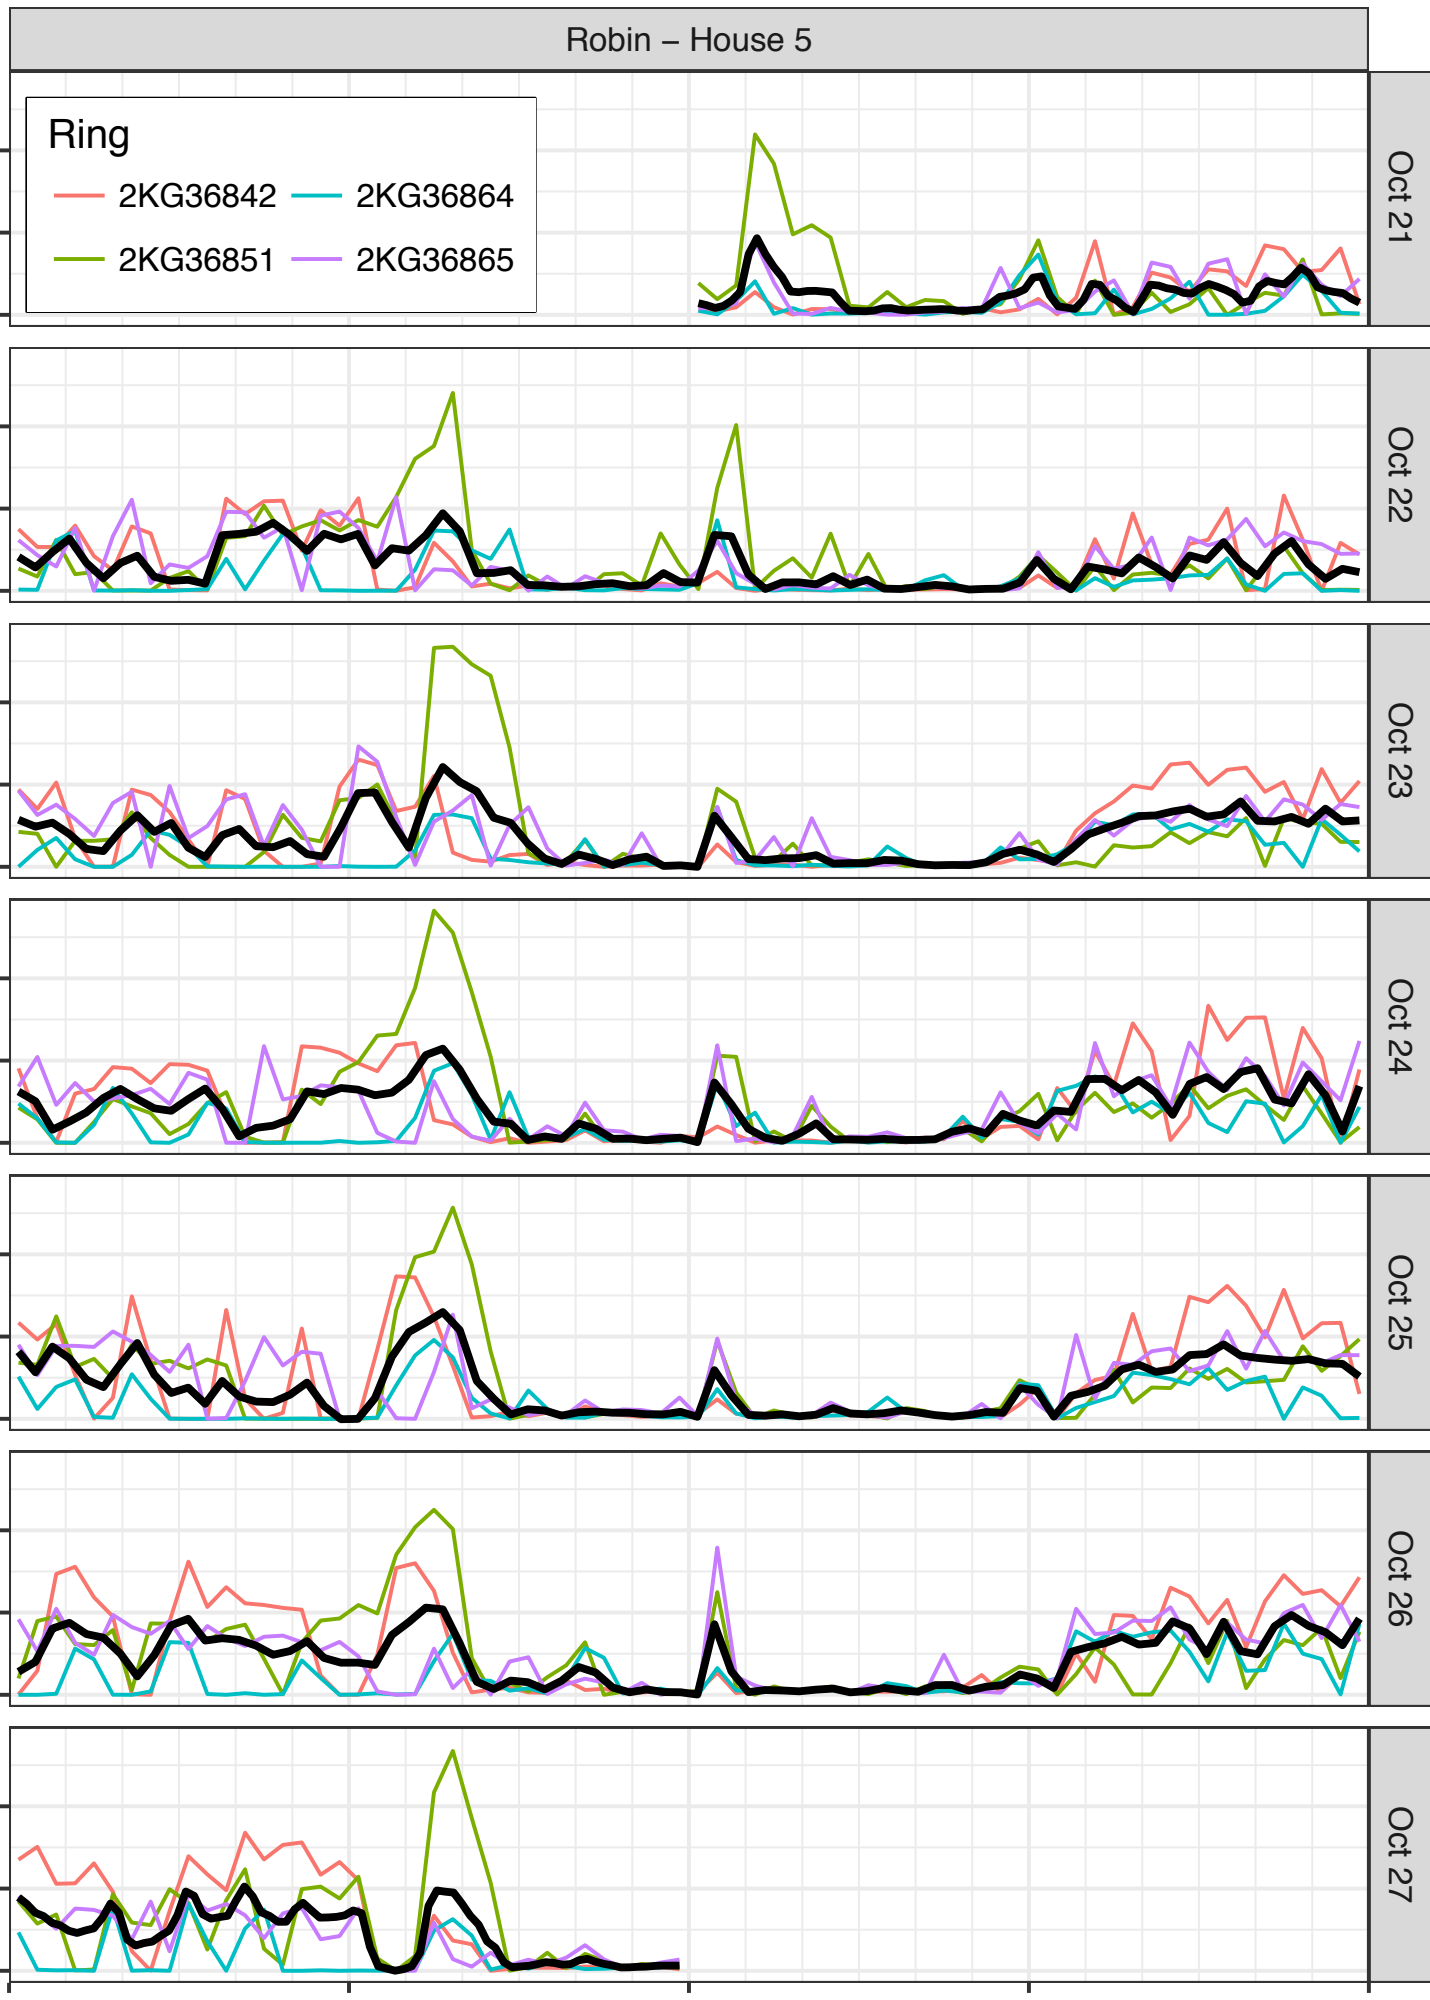

Supplement: rsbl20180918supp3.pdf [file rsbl20180918supp3.pdf]
